# Supplementary material for: Unveiling the structural evolution of 1T SnS2 anode upon lithiation/delithiation by TEM
Source: Royal Society of Chemistry journal article supplement (doi:10.1039/c9cc03320c), 2019-01-01
Supplement: c9cc03320c1.pdf [file c9cc03320c1.pdf]

## Supporting Information

# Unveiling the structure evolution of 1T SnS<sub>2</sub> anode upon lithiation/delithiation by TEM

*Ruicong Xie<sup>†,a</sup>, Ying Cui<sup>†,a</sup>, Tong Zhou<sup>a</sup>, Junqiang Ren<sup>b</sup>, Longchao Zhuo<sup>c</sup>, Jun Luo<sup>a</sup>, Chao Li<sup>\*,a</sup>, Xizheng Liu<sup>\*,a</sup>*

<sup>a</sup>Tianjin Key Laboratory of Advanced Functional Porous Materials, Institute for New Energy Materials and Low-Carbon Technologies, School of Materials Science and Engineering, Tianjin University of Technology, Tianjin 300384, P.R. China.

<sup>b</sup>State Key Laboratory of Advanced Processing and Recycling of Nonferrous Metals, Department of Materials Science and Engineering, Lanzhou University of Technology, Lanzhou, Gansu 730050, China.

<sup>c</sup>School of Materials Science and Engineering, Xi'an University of Technology, Xi'an 710048, China.

### Corresponding Author

\*Correspondence and requests for materials should be addressed to:  
[chao\\_li@tjut.edu.cn](mailto:chao_li@tjut.edu.cn); [xzliu@tjut.edu.cn](mailto:xzliu@tjut.edu.cn)

### Table of contents

Supplementary Methods (Pages 2)

Supplementary Figures (Pages 3-4)

## Supplementary Methods

### Synthesis of 1T SnS<sub>2</sub> nanosheets

All of the chemicals were purchased and used directly without further purification. The flake-like 1T SnS<sub>2</sub> nanosheets were prepared by hydrothermal method. In a typical preparation, 2.1 g of SnCl<sub>4</sub>·5H<sub>2</sub>O and 3.0 g of thiourea (CH<sub>4</sub>N<sub>2</sub>S) were added to 70 mL of deionized water and magnetically stirred for 20 minutes to form a homogeneous solution. The solution was then transferred into a 100 mL Teflon-lined autoclave with a stainless steel shell, which heated at 180°C for 15 h. Finally, the sample was washed several times with CS<sub>2</sub> and dried at 50°C for 8h in a vacuum<sup>19,20</sup>.

### Cell fabrication

CR2032 coin cells were prepared to evaluate electrochemical performance. The electrode composites consisted of 80wt % active materials (1T SnS<sub>2</sub> or purchased SnS<sub>2</sub>), 10wt % conductive agent (acetylene black, AB) and 10wt % binder (carboxyl methyl cellulose sodium, CMC). Copper foil was used as collector. Lithium metal was used as counter electrode and 1 mol L<sup>-1</sup> LiPF<sub>6</sub> dissolved in EC:DEC (1:1 in volume ratio) as electrolyte.

### Characterizations

The phase composition and crystallinity of the sample were determined by X-ray diffraction (XRD, SmartLab 9KW) using Cu K $\alpha$  radiation in the range from 10° to 90°. TEM images and SAED patterns were carried out on the FEI Talos F200X with a field-emission gun and an accelerating voltage of 200 kV. The atomic resolution high-angle annular dark field (HAADF) images were obtained by using an aberration-corrected scanning TEM operated at 200 kV (FEI Titan Cubed Themis G2 300). Scanning electron microscopy (SEM) images were revealed by the FEI verios 460L. The electrochemical performance was carried out on LAND CT2001A battery test system. The impedance was carried out by electrochemical impedance spectroscopy (EIS) in the range of 10<sup>-2</sup> to 10<sup>5</sup> Hz with AC voltage of 5 mV. Cyclic voltammetry (CV) was analysed by an electrochemical workstation (CHI 760E Shanghai, China) in the cut-off potential of 0.01-3.0 V at a scanning rate of 0.1 mV s<sup>-1</sup>.

## Supplementary Figures

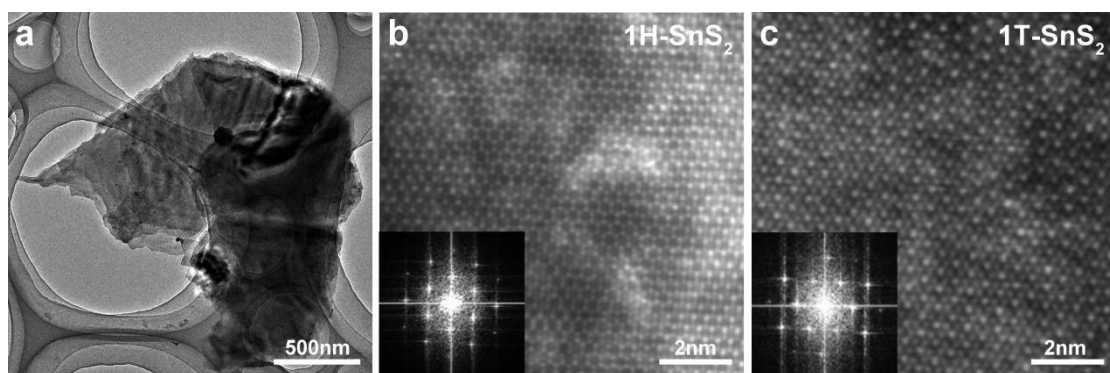

**Fig. S1** (a) The low magnification images of purchased SnS<sub>2</sub>. (b) 1H atomic resolution HADDF of purchased SnS<sub>2</sub>. (c) 1T atomic resolution HADDF of purchased SnS<sub>2</sub>.

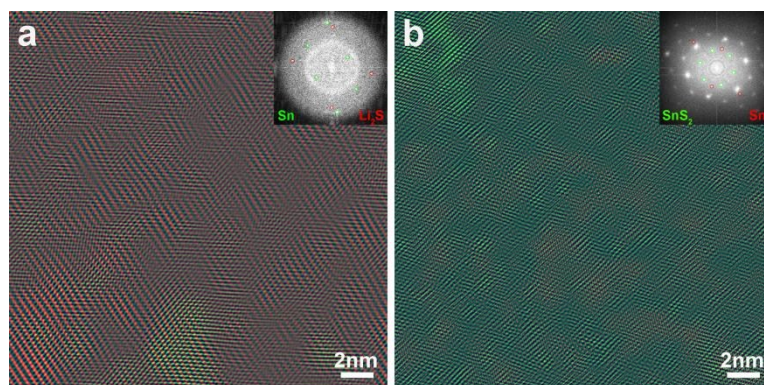

**Fig. S2** HRTEM of SnS<sub>2</sub> electrode sheets during lithiation. (a) 0.39 V of discharge state. (b) 2.33 V of charge state.
